# Supplementary material
Source: Springer Nature journal article supplement (https://www.springermedizin.de/resource/supplementary/12879_2014_3169_MOESM8_ESM.pdf/9446110)

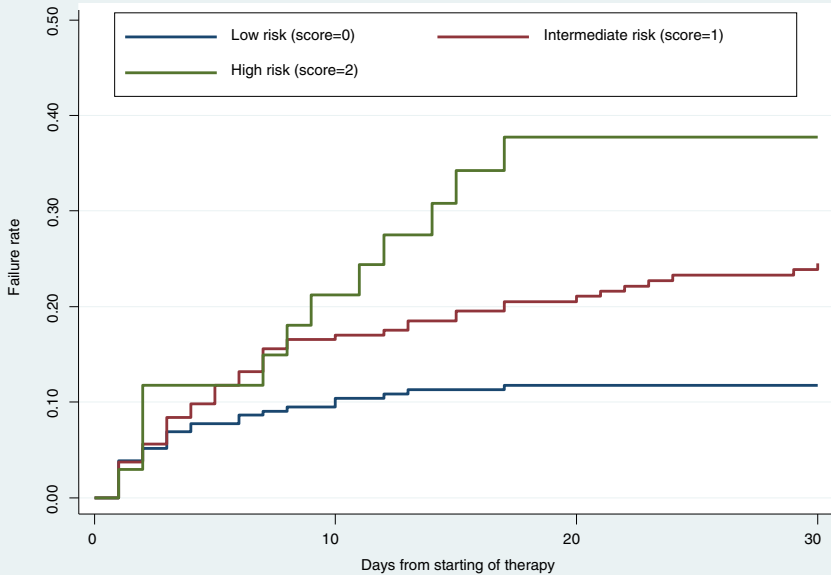

Number at risk

|           |            |      |            |     |            |     |            |
|-----------|------------|------|------------|-----|------------|-----|------------|
| Score = 0 | <b>232</b> | (22) | <b>206</b> | (5) | <b>176</b> | (0) | <b>137</b> |
| Score = 1 | <b>215</b> | (35) | <b>171</b> | (8) | <b>150</b> | (6) | <b>118</b> |
| Score = 2 | <b>34</b>  | (7)  | <b>25</b>  | (5) | <b>17</b>  | (0) | <b>10</b>  |

Supplement: MOESM8 [file 9446110]
